# Supplementary material
Source: PubMed Central journal article supplement (PMC6893492)

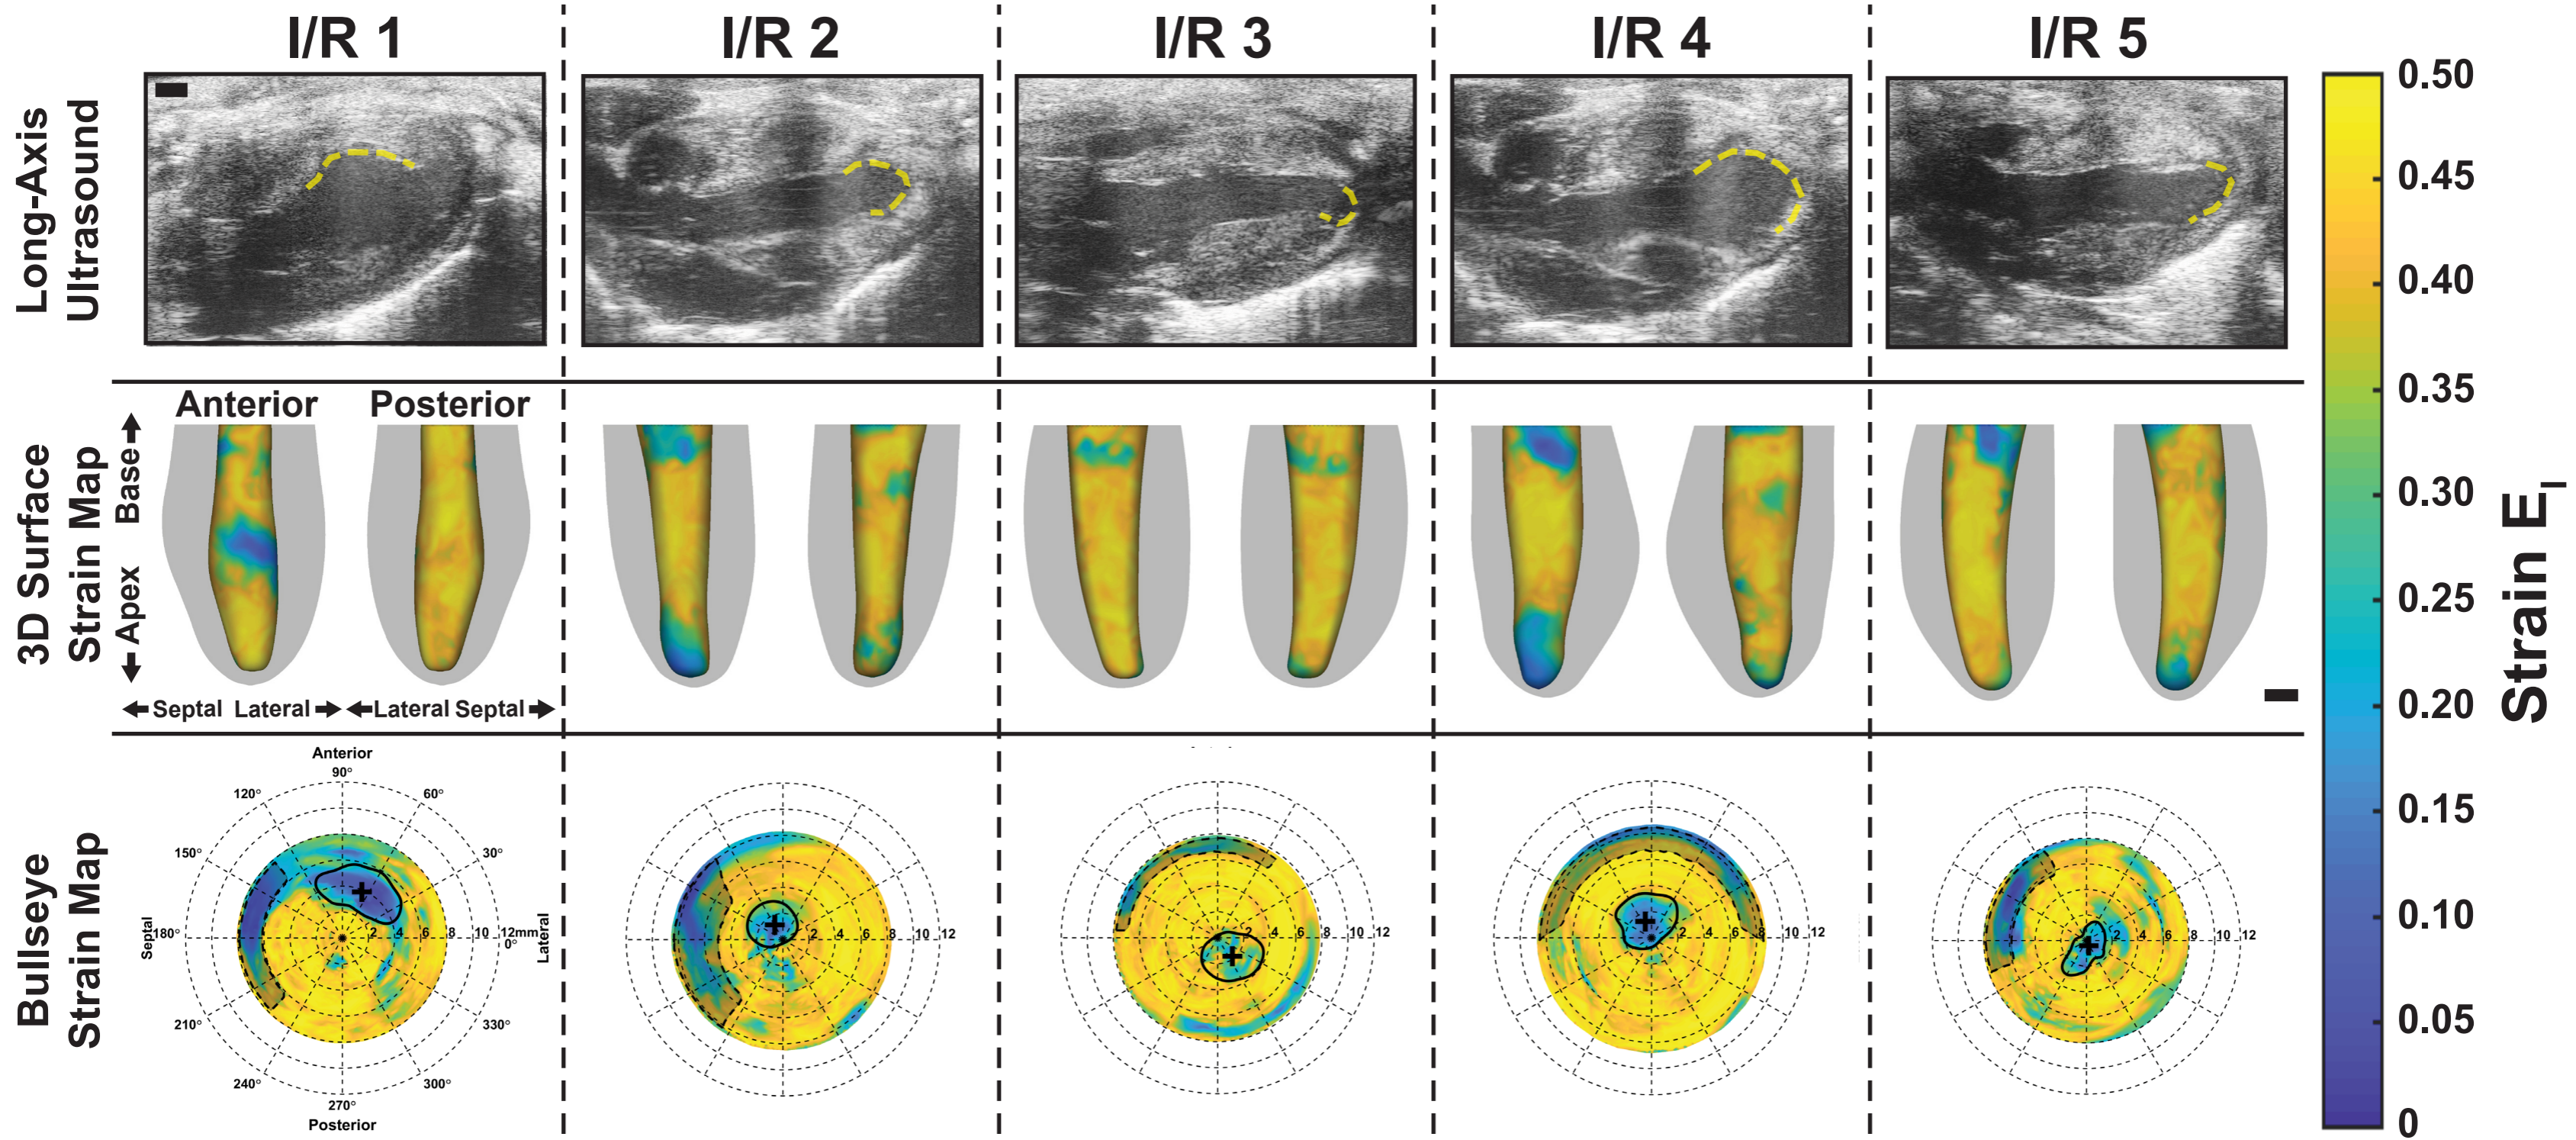

Supplement: rsif20190570supp3.pdf [file rsif20190570supp3.pdf]

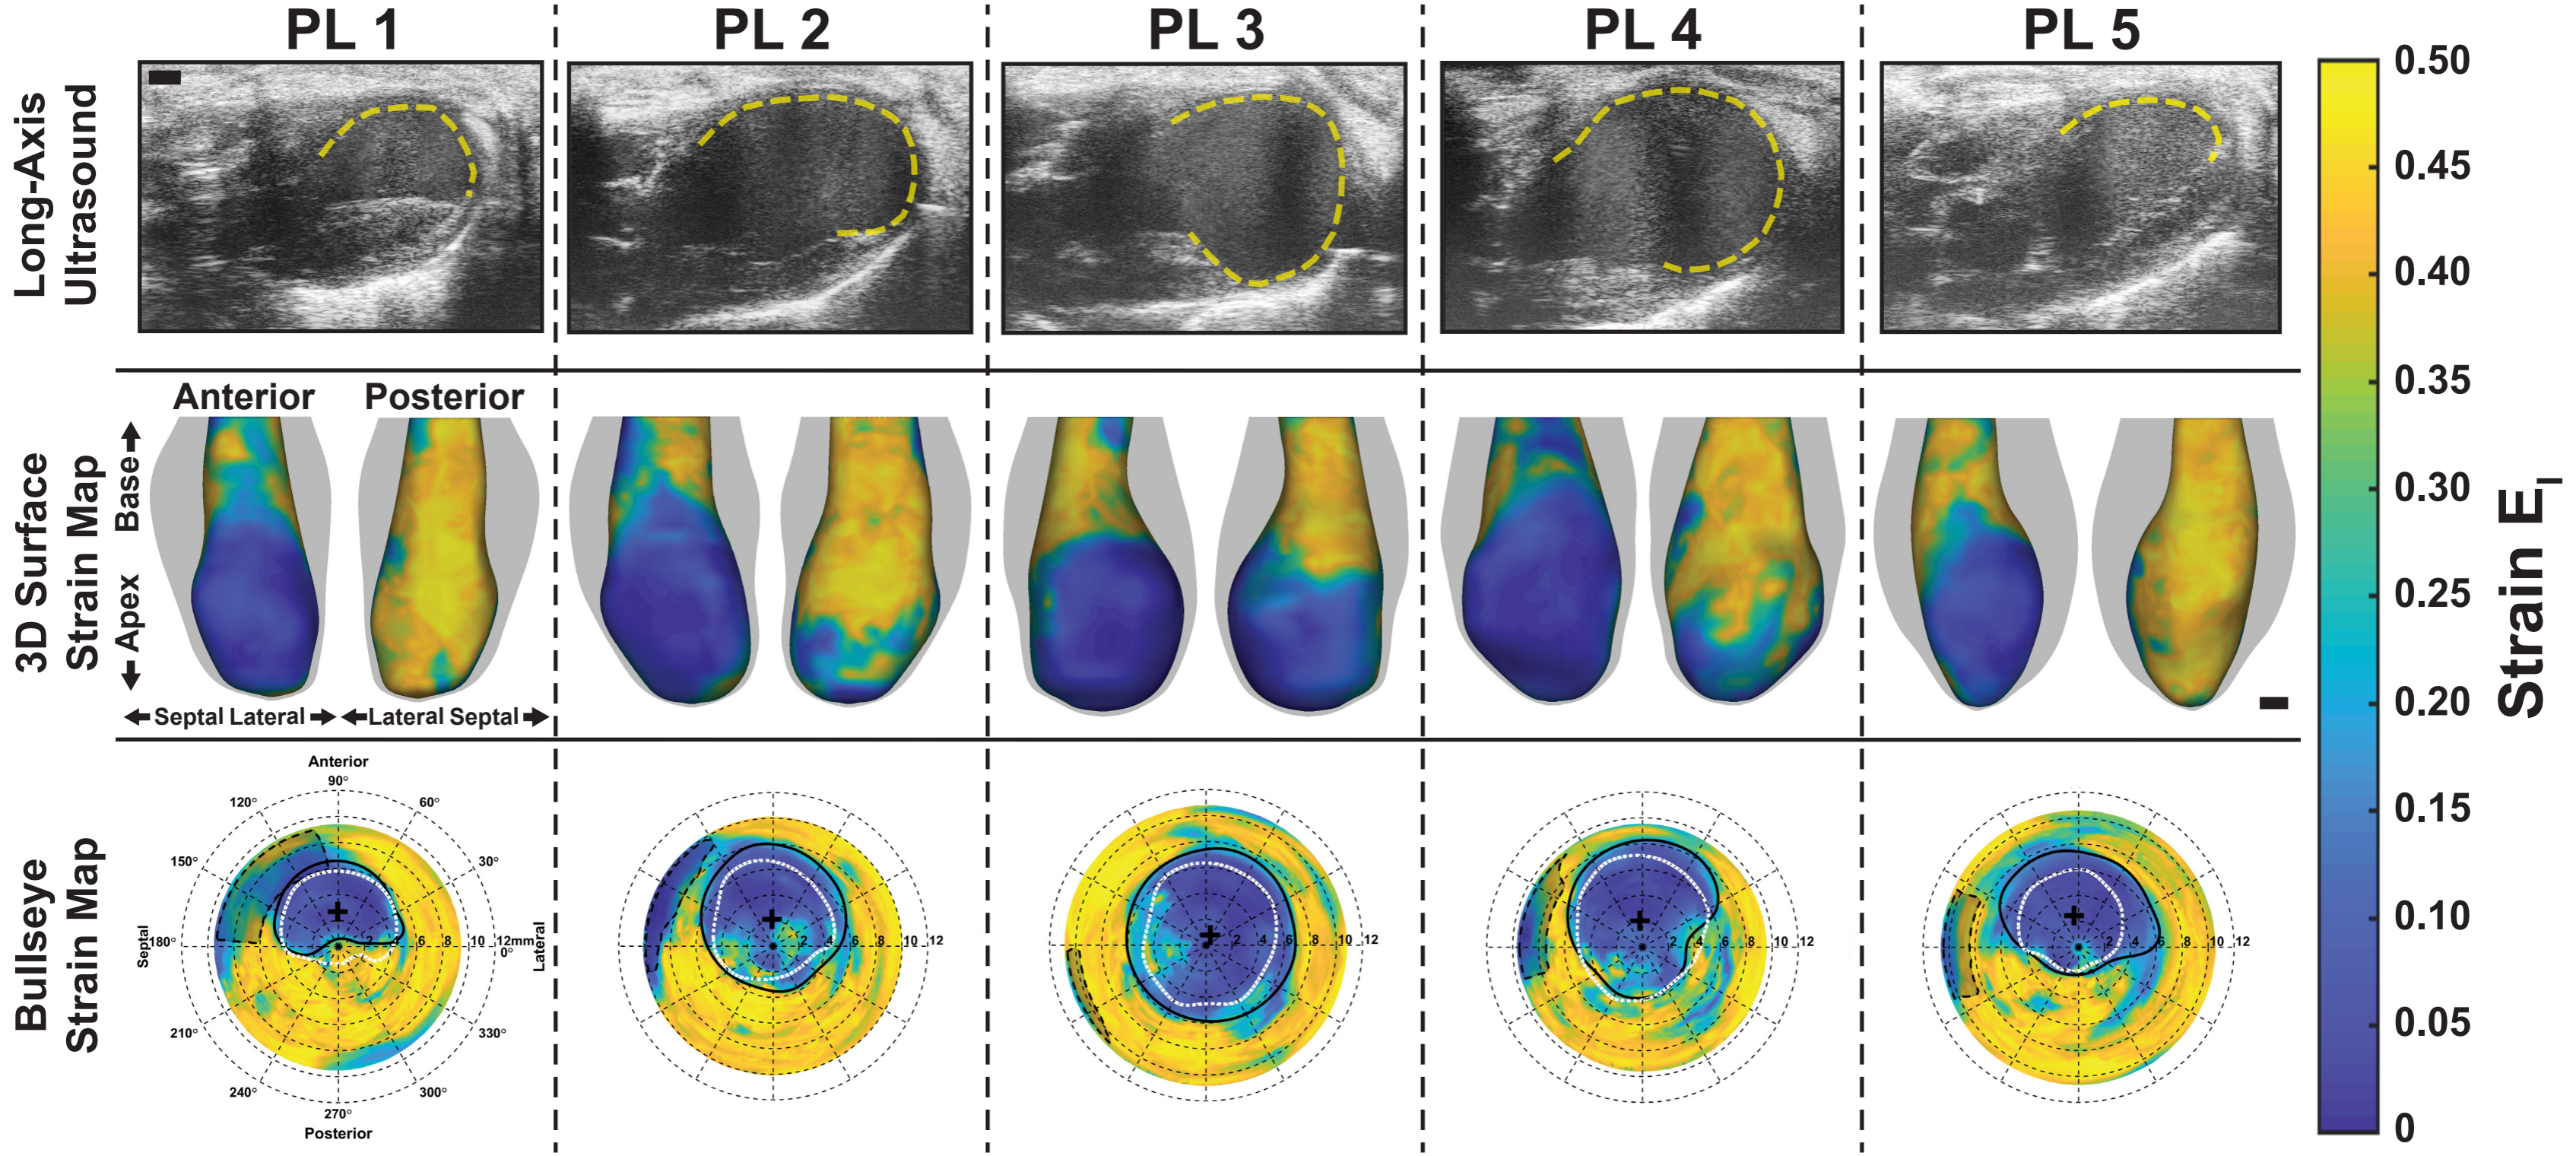

Supplement: rsif20190570supp4.pdf [file rsif20190570supp4.pdf]

# Sham: Day 28

# I/R: Day 28

# PL: Day 28

Base

Mid-Papillary

Apex

Short-Axis

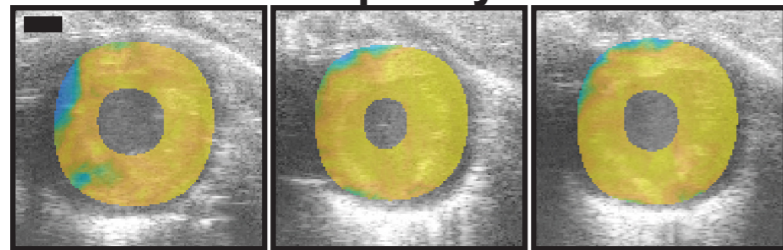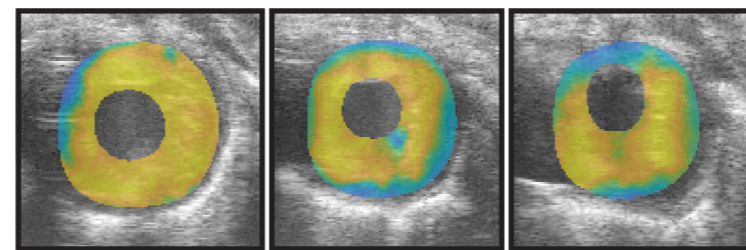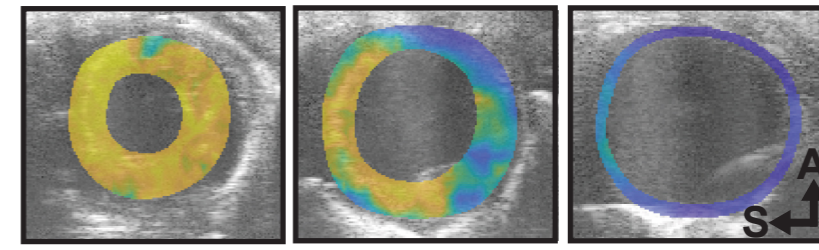

Long-Axis

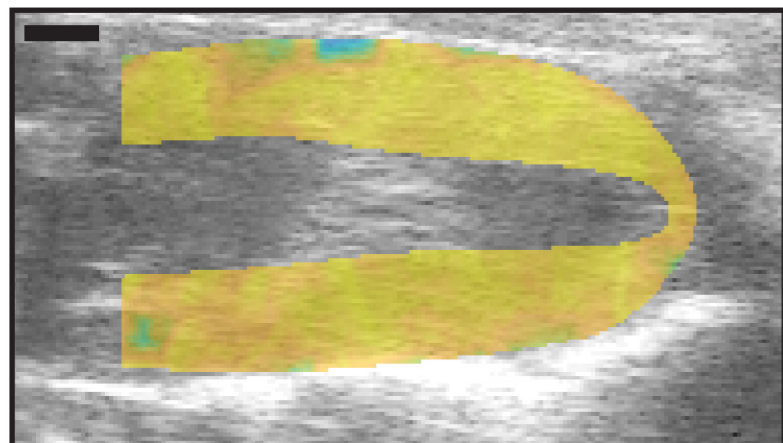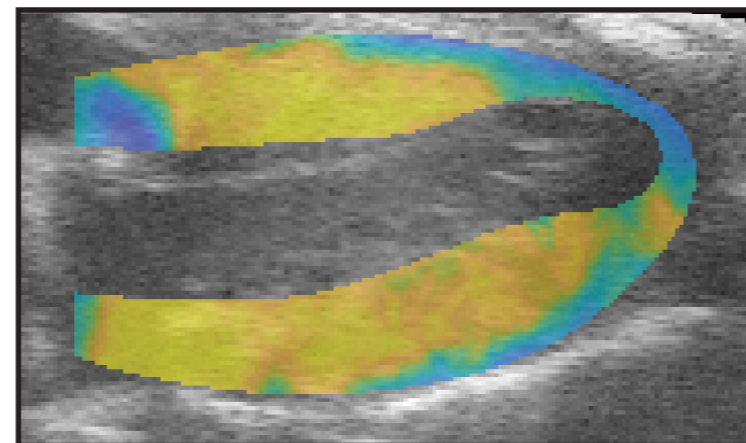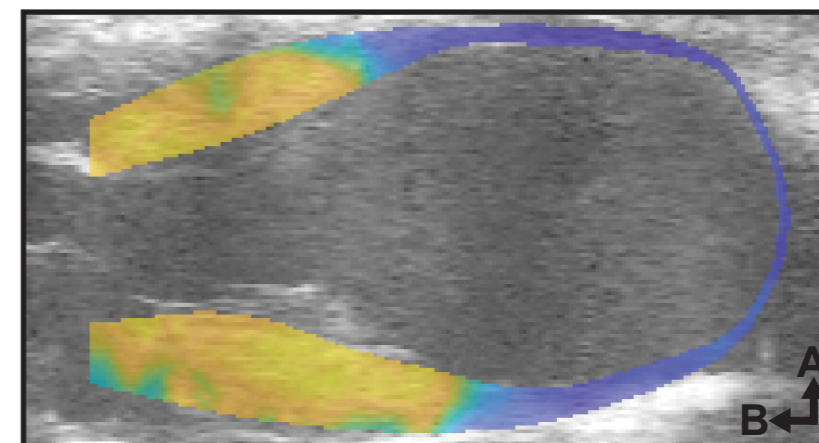

Coronal-Axis

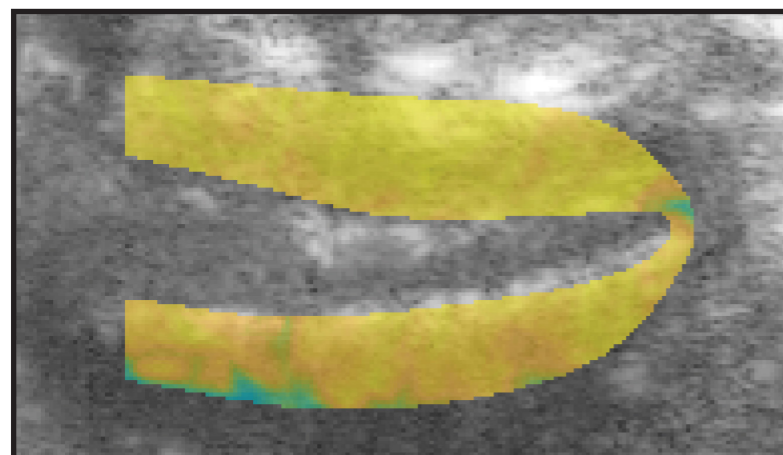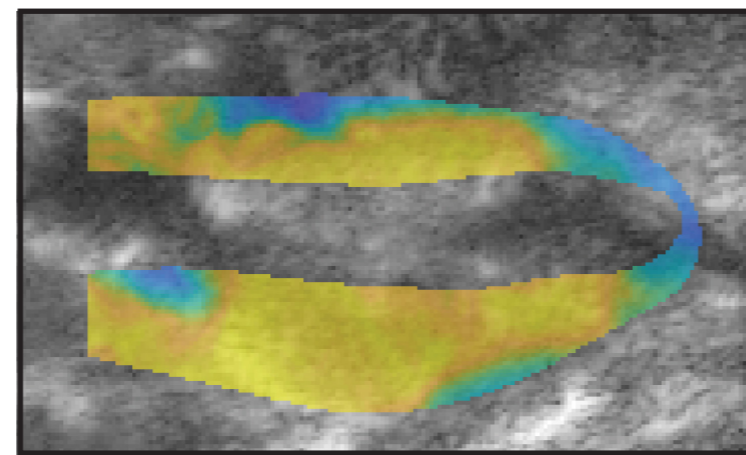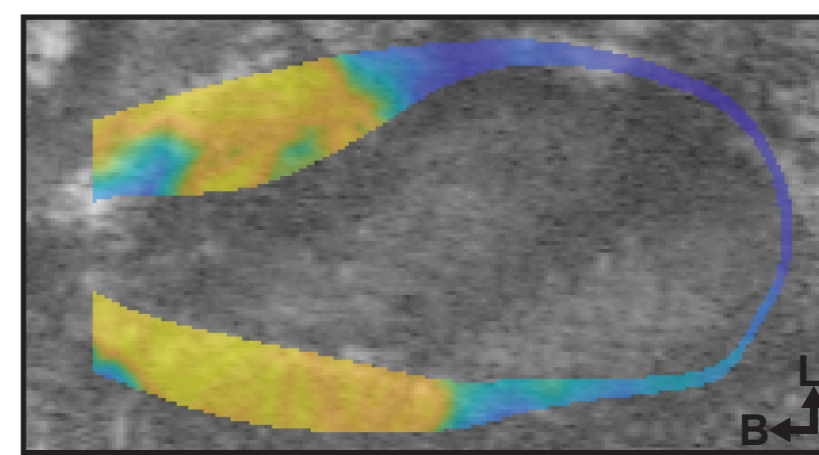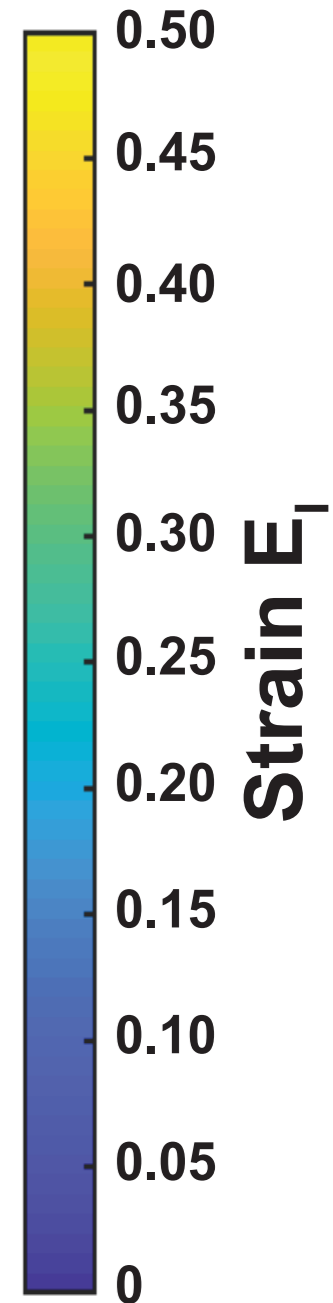

Supplement: rsif20190570supp5.pdf [file rsif20190570supp5.pdf]

### 3D-DDE

### Vic2D

### Strain Comparison

## Baseline

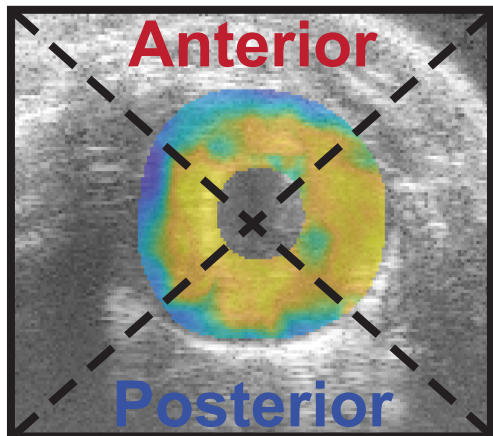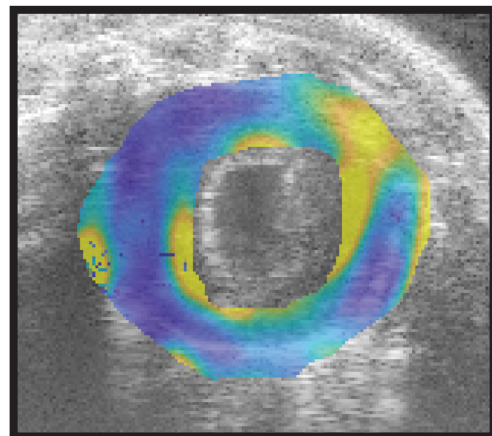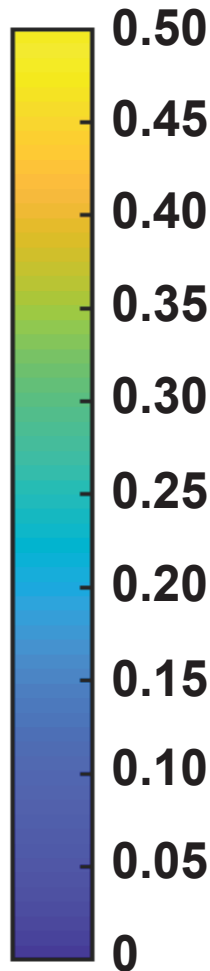

## Day 28

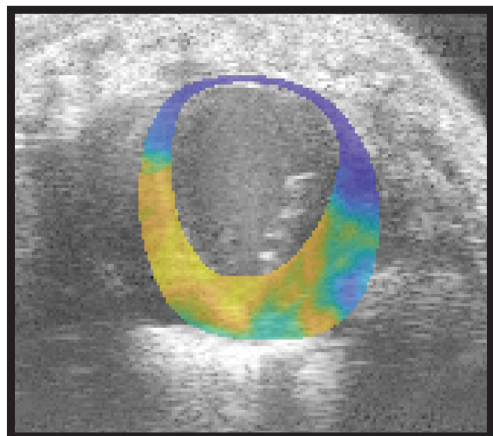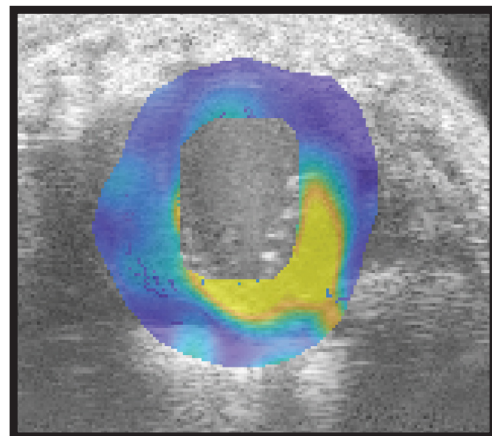

## Strain $E_1$

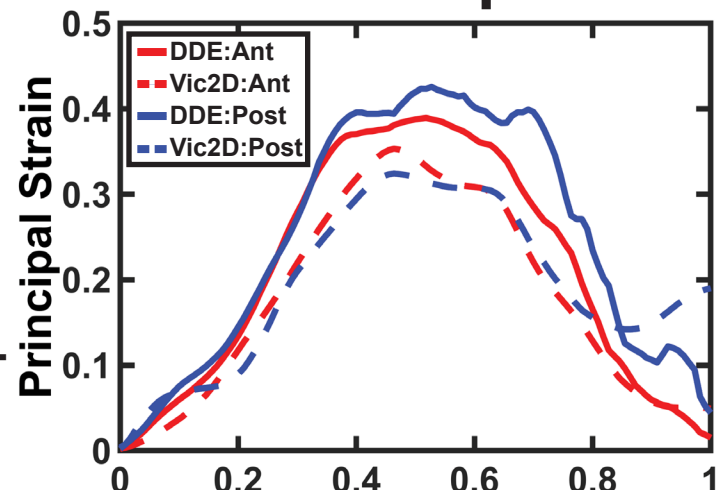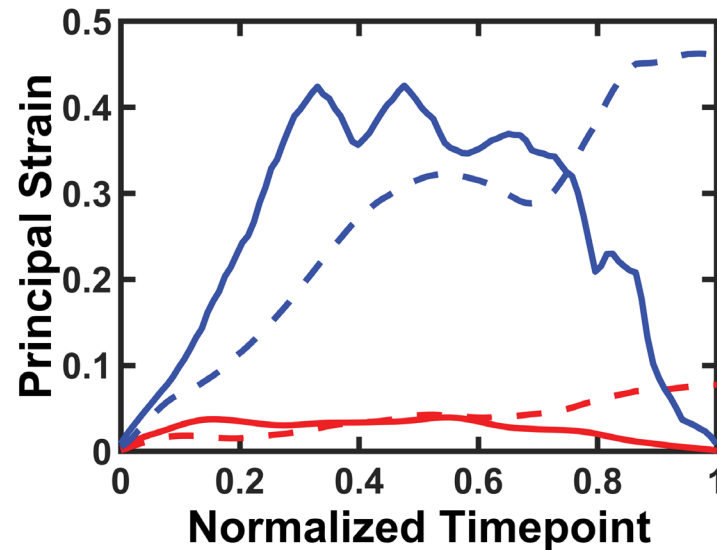

Supplement: rsif20190570supp6.pdf [file rsif20190570supp6.pdf]

# Bullseye Strain: Baseline

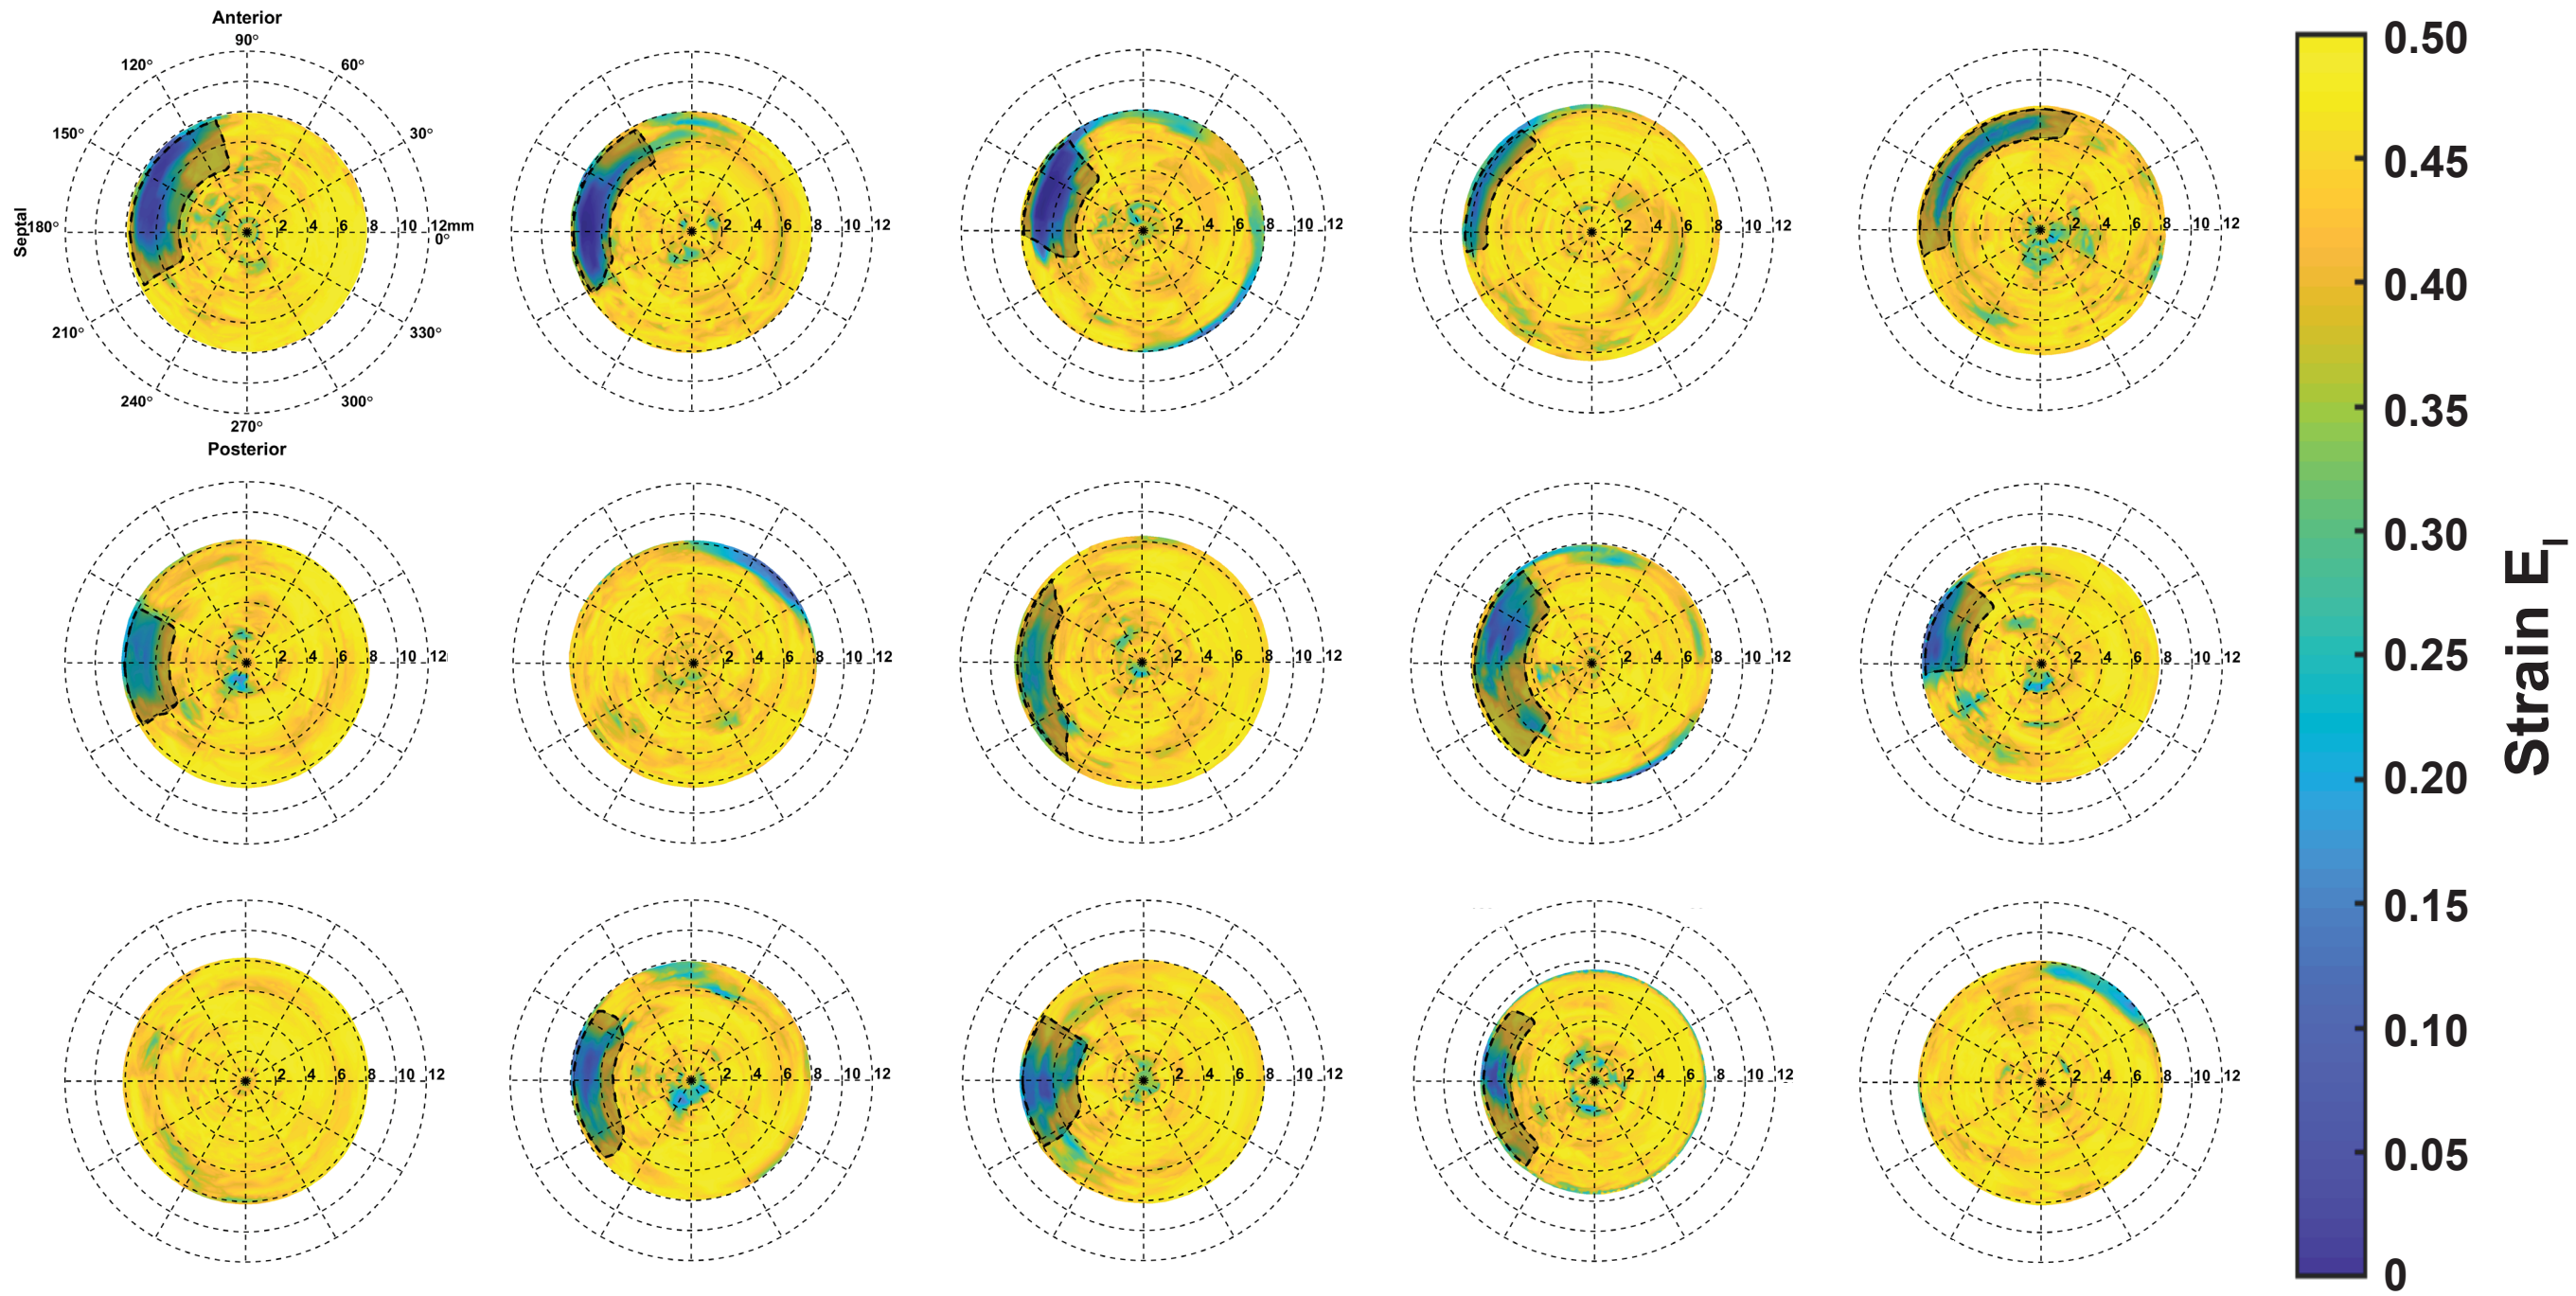

Supplement: rsif20190570supp7.pdf [file rsif20190570supp7.pdf]
